# Supplementary material for: Contributory role of SARS-CoV-2 genomic variations and life expectancy in COVID-19 transmission and low fatality rate in Africa
Source: PubMed Central journal article supplement (PMC7723464; doi:10.1186/s43042-020-00116-x), 2020-12-09
Supplement: 43042_2020_116_MOESM2_ESM.pdf [file 43042_2020_116_MOESM2_ESM.pdf]

| S/No | Country      | Confirmed cases | Total deaths | Recovered cases | Total test done | Population  | Testing rate | Fatality rate | Recovery rate |
|------|--------------|-----------------|--------------|-----------------|-----------------|-------------|--------------|---------------|---------------|
|      | Africa       | 1,359,569       | 32,678       | 1,104,047       |                 |             |              | 2.40%         | 81.21%        |
| 1    | South Africa | 649,793         | 15,447       | 577,906         | 3,918,478       | 59,461,240  | 6.59%        | 2.38%         | 88.94%        |
| 2    | Egypt        | 101,009         | 5,648        | 84,161          | 135,000         | 102,722,504 | 0.13%        | 5.59%         | 83.32%        |
| 3    | Morocco      | 86,686          | 1,578        | 67,528          | 2,230,069       | 36,999,965  | 6.03%        | 1.82%         | 77.90%        |
| 4    | Ethiopia     | 64,301          | 1,013        | 24,983          | 1,138,012       | 115,528,092 | 0.99%        | 1.58%         | 38.85%        |
| 5    | Nigeria      | 56,256          | 1,082        | 44,152          | 440,248         | 207,152,368 | 0.21%        | 1.92%         | 78.48%        |
| 6    | Algeria      | 48,254          | 1,612        | 34,037          |                 | 44,010,565  |              | 3.34%         | 70.54%        |
| 7    | Ghana        | 45,434          | 286          | 44,342          | 450,872         | 31,202,737  | 1.44%        | 0.63%         | 97.60%        |
| 8    | Kenya        | 36,157          | 622          | 23,067          | 481,982         | 54,007,662  | 0.89%        | 1.72%         | 63.80%        |
| 9    | Libya        | 22,781          | 362          | 12,183          | 157,481         | 6,890,311   | 2.29%        | 1.59%         | 53.48%        |
| 10   | Cameroon     | 20,167          | 415          | 18,837          | 149,000         | 26,676,814  | 0.56%        | 2.06%         | 93.41%        |
| 11   | Ivory Coast  | 19,013          | 120          | 18,112          | 142,248         | 26,507,763  | 0.54%        | 0.63%         | 95.26%        |
| 12   | Madagascar   | 15,757          | 211          | 14,368          | 64,174          | 27,831,811  | 0.23%        | 1.34%         | 91.18%        |
| 13   | Senegal      | 14,280          | 297          | 10,520          | 158,751         | 16,831,055  | 0.94%        | 2.08%         | 73.67%        |
| 14   | Zambia       | 13,539          | 312          | 12,260          | 131,034         | 18,485,203  | 0.71%        | 2.30%         | 90.55%        |
| 15   | Sudan        | 13,516          | 835          | 6,757           |                 | 44,052,920  |              | 6.18%         | 49.99%        |
| 16   | DRC          | 10,390          | 264          | 9,756           |                 | 90,093,630  |              | 2.54%         | 93.90%        |
| 17   | Guinea       | 10,045          | 63           | 9,292           | 28,140          | 13,203,001  | 0.21%        | 0.63%         | 92.50%        |
| 18   | Namibia      | 9,719           | 101          | 6,543           | 80,352          | 2,550,174   | 3.15%        | 1.04%         | 67.32%        |
| 19   | Gabon        | 8,643           | 53           | 7,706           | 135,615         | 2,236,175   | 6.06%        | 0.61%         | 89.16%        |
| 20   | Zimbabwe     | 7,526           | 224          | 5,678           | 154,733         | 14,906,868  | 1.04%        | 2.98%         | 75.45%        |
| 21   | Mauritania   | 7,276           | 161          | 6,825           | 76,256          | 4,673,795   | 1.63%        | 2.21%         | 93.80%        |
| 22   | Tunisia      | 6,635           | 107          | 1,991           | 171,786         | 11,843,970  | 1.45%        | 1.61%         | 30.01%        |
| 23   | Malawi       | 5,690           | 177          | 3,731           | 48,556          | 19,227,686  | 0.25%        | 3.11%         | 65.57%        |
| 24   | Djibouti     | 5,395           | 61           | 5,330           | 71,757          | 990,918     | 7.24%        | 1.13%         | 98.80%        |

|    |                      |       |     |       |         |            |        |       |        |
|----|----------------------|-------|-----|-------|---------|------------|--------|-------|--------|
| 25 | Mozambique           | 5,269 | 35  | 2,960 | 114,333 | 31,427,632 | 0.36%  | 0.66% | 56.18% |
| 26 | Eswatini             | 5,075 | 98  | 4,229 | 31,061  | 1,162,627  | 2.67%  | 1.93% | 83.33% |
| 27 | Equatorial<br>Guinea | 4,996 | 83  | 4,490 | 55,783  | 1,411,938  | 3.95%  | 1.66% | 89.87% |
| 28 | Congo                | 4,928 | 88  | 3,887 |         | 5,545,022  |        | 1.79% | 78.88% |
| 29 | Cabo Verde           | 4,813 | 44  | 4,119 | 76,576  | 557,224    | 13.74% | 0.91% | 85.58% |
| 30 | Uganda               | 4,799 | 55  | 2,256 | 423,214 | 46,022,522 | 0.92%  | 1.15% | 47.01% |
| 31 | CAR                  | 4,749 | 62  | 1,825 | 31,459  | 4,846,711  | 0.65%  | 1.31% | 38.43% |
| 32 | Rwanda               | 4,591 | 22  | 2,556 | 462,896 | 13,015,862 | 3.56%  | 0.48% | 55.67% |
| 33 | Gambia               | 3,405 | 103 | 1,723 | 14,410  | 2,430,016  | 0.59%  | 3.02% | 50.60% |
| 34 | Somalia              | 3,389 | 98  | 2,803 |         | 15,980,442 |        | 2.89% | 82.71% |
| 35 | Angola               | 3,388 | 134 | 1,301 | 64,747  | 33,065,753 | 0.20%  | 3.96% | 38.40% |
| 36 | Mayotte              | 3,374 | 40  | 2,964 | 13,000  | 274,122    | 4.74%  | 1.19% | 87.85% |
| 37 | Mali                 | 2,924 | 128 | 2,285 | 44,439  | 20,365,308 | 0.22%  | 4.38% | 78.15% |
| 38 | Réunion              | 2,805 | 15  | 1,313 | 35,419  | 896,631    | 3.95%  | 0.53% | 46.81% |
| 39 | South Sudan          | 2,578 | 49  | 1,290 | 12,044  | 11,220,552 | 0.11%  | 1.90% | 50.04% |
| 40 | Guinea-<br>Bissau    | 2,275 | 39  | 1,127 |         | 1,977,247  |        | 1.71% | 49.54% |
| 41 | Benin                | 2,267 | 40  | 1,942 | 158,881 | 12,185,927 | 1.30%  | 1.76% | 85.66% |
| 42 | Botswana             | 2,252 | 10  | 546   | 138,290 | 2,361,144  | 5.86%  | 0.44% | 24.25% |
| 43 | Sierra Leone         | 2,109 | 72  | 1,636 |         | 8,009,487  |        | 3.41% | 77.57% |

|    |                       |           |        |           |         |            |        |        |        |
|----|-----------------------|-----------|--------|-----------|---------|------------|--------|--------|--------|
| 44 | Burkina Faso          | 1,707     | 56     | 1,135     |         | 21,016,156 |        | 3.28%  | 66.49% |
| 45 | Togo                  | 1,572     | 37     | 1,190     | 77,212  | 8,317,313  | 0.93%  | 2.35%  | 75.70% |
| 46 | Liberia               | 1,319     | 82     | 1,210     |         | 5,081,319  |        | 6.22%  | 91.74% |
| 47 | Lesotho               | 1,245     | 33     | 528       | 15,632  | 2,145,750  | 0.73%  | 2.65%  | 42.41% |
| 48 | Niger                 | 1,180     | 69     | 1,104     | 9,052   | 24,375,373 | 0.04%  | 5.85%  | 93.56% |
| 49 | Chad                  | 1,084     | 80     | 938       |         | 16,518,393 |        | 7.38%  | 86.53% |
| 50 | Sao Tome and Principe | 906       | 15     | 870       | 4,310   | 219,978    | 1.96%  | 1.66%  | 96.03% |
| 51 | Tanzania              | 509       | 21     | 183       |         | 60,068,408 |        | 4.13%  | 35.95% |
| 52 | Burundi               | 472       | 1      | 374       | 27,836  | 11,960,116 | 0.23%  | 0.21%  | 79.24% |
| 53 | Comoros               | 456       | 7      | 415       |         | 873,304    | 0.00%  | 1.54%  | 91.01% |
| 54 | Mauritius             | 361       | 10     | 335       | 227,409 | 1,272,209  | 17.88% | 2.77%  | 92.80% |
| 55 | Eritrea               | 361       |        | 304       |         | 3,556,406  |        | 0.00%  | 84.21% |
| 56 | Seychelles            | 139       |        | 136       | 5,200   | 98,473     | 5.28%  | 0.00%  | 97.84% |
| 57 | Western Sahara        | 10        | 1      | 8         |         | 600252     |        | 10.00% | 80.00% |
|    | Total:                | 1,359,569 | 32,678 | 1,104,047 |         |            |        | 2.40%  | 81.21% |
